# Supplementary material for: Conditional Knockout of Hypoxia-Inducible Factor 1-Alpha in Tumor-Infiltrating Neutrophils Protects against Pancreatic Ductal Adenocarcinoma
Source: MDPI journal article supplement (doi:10.3390/ijms24010753), 2023-01-01
Supplement: s1 [file s1]

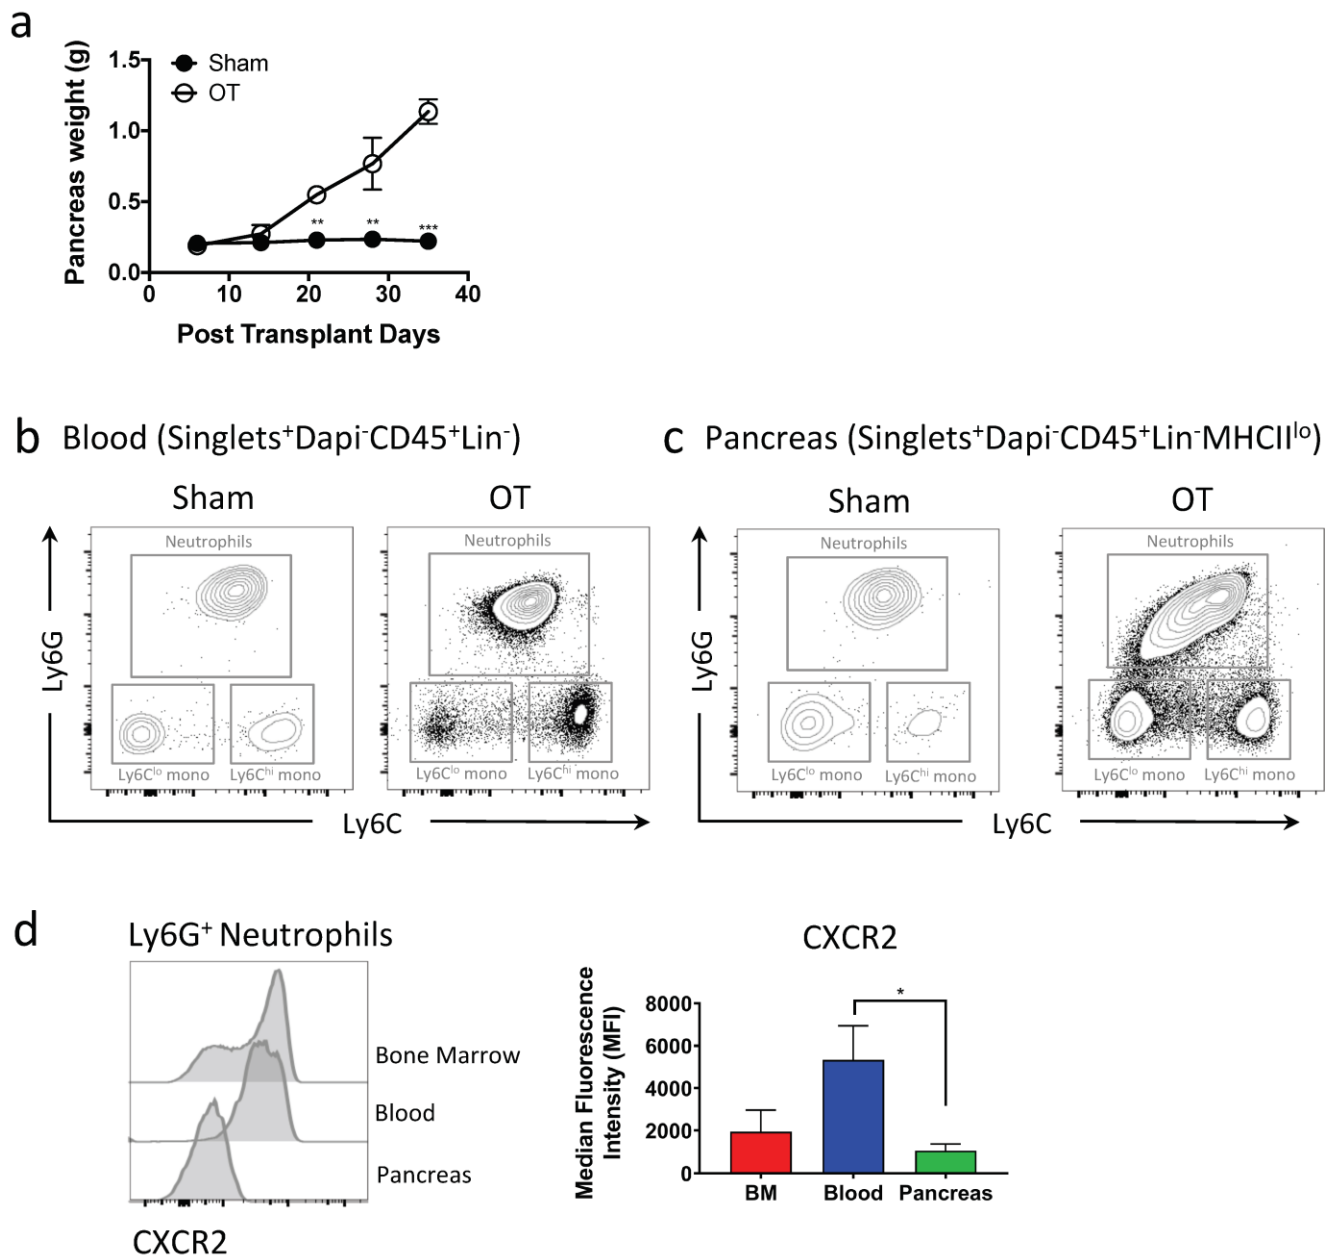

**Supplementary Figure S1.** (a) Scatter plot of orthotopic tumor weights at 6, 14, 21, 28 and 35 days post transplantation in orthotopically transplanted (OT) and sham non-tumor bearing mice ( $n = 3$  mice per experiment at each time point). Data represent the means  $\pm$  SEM,  $**p < 0.01$ ;  $***p < 0.001$  by unpaired student's  $t$ -test with 95% confidence interval. (b) Flow cytometry gating strategy of blood and (c) pancreatic neutrophil populations in a representative OT and wild-type (WT) sample. (d) Representative flow cytometry histogram showing CXCR2 expression in the bone marrow, blood and pancreas of OT mice ( $n = 10$  of three independent experiments).  $*p < 0.05$ .



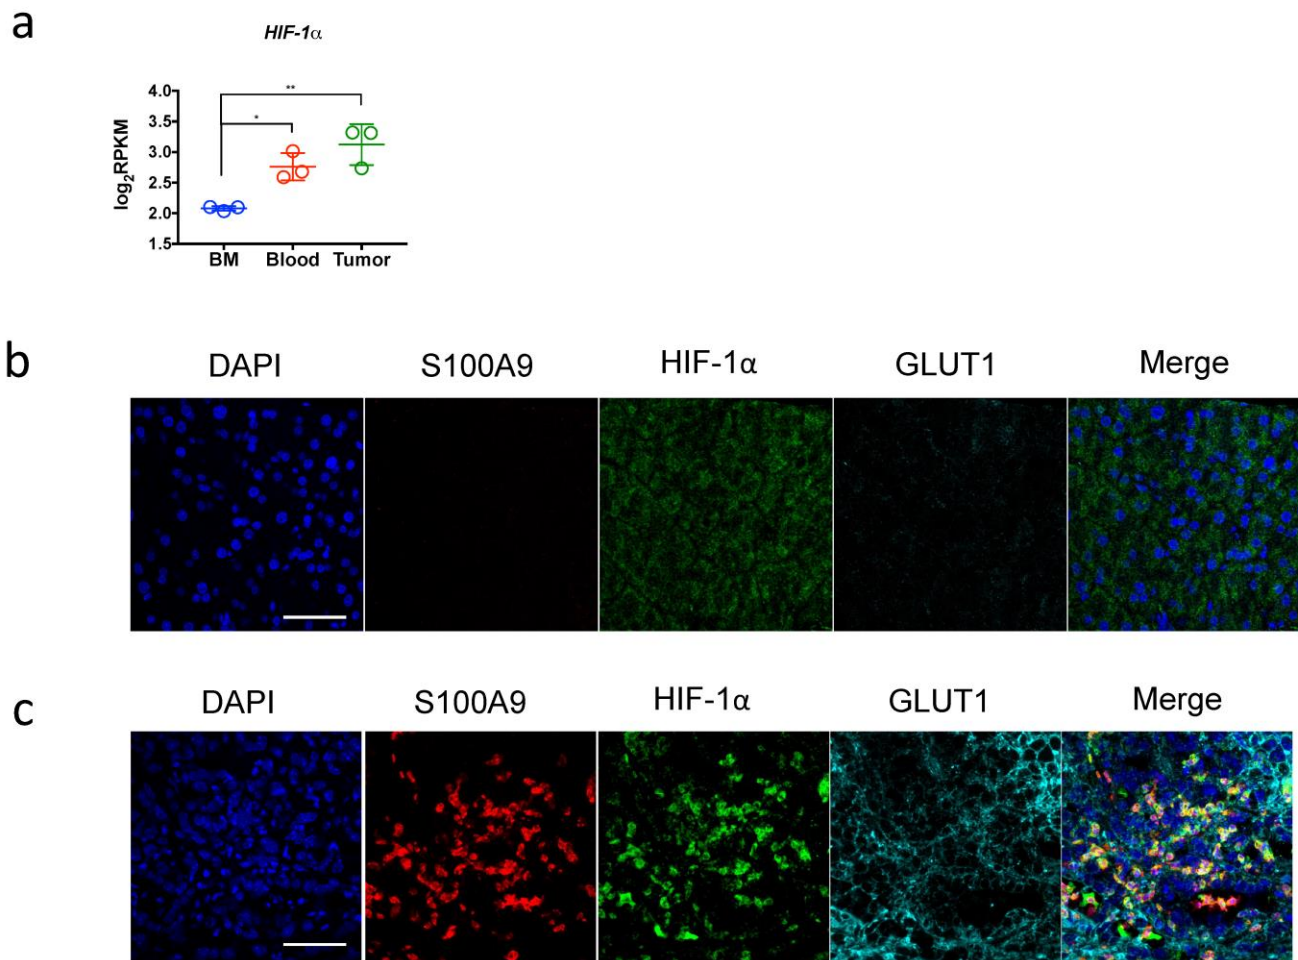

**Supplementary Figure S2.** (a) Bone marrow (BM), blood and tumor neutrophils were sorted based on their expression of Dapi-CD45<sup>+</sup>Lin( CD3/B220/NK1.1)<sup>-</sup> Ly6G<sup>+</sup>Ly6C<sup>+</sup> (orthotopic transplanted [OT] n = 5 mice pooled, three independent experiments). Hierarchical clustering and principal component analysis (PCA) were performed with log<sub>2</sub>-transformed values. Shown are scatter plots of transcriptomic data of HIF-1 $\alpha$  expression in the BM, blood and tumor neutrophils respectively. (b-c) Formalin-fixed paraffin-embedded pancreata sections of sham non-tumor bearing control mice (b) and orthotopic transplanted (OT) mice (c) stained with a neutrophil marker, S100A9 (red), and glycolytic markers HIF-1 $\alpha$  (white) and GLUT1 (green). Immunofluorescence images are representative of n = 3 mice per group, 10 - 15 fields of view. Scale bar = 100  $\mu$ M.



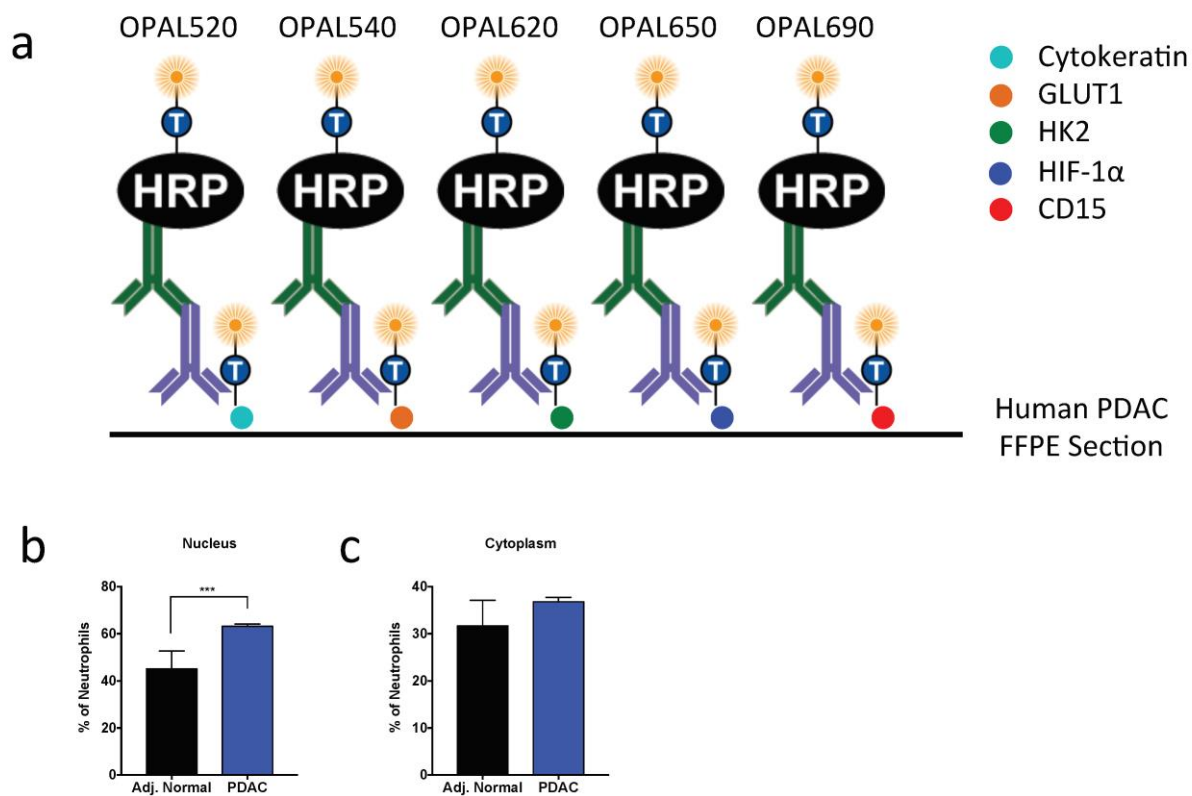

**Supplementary Figure S3.** (a) Sequential, multiplex, immunofluorescence panel of neutrophil marker (CD15), anti-pan cytokeratin (CK), and metabolic markers (HIF-1 $\alpha$ , GLUT1 and HK2) to stain formalin-fixed paraffin-embedded (FFPE) pancreas sections obtained from multi-center PDAC patient cohorts. (b) Activation and translocation of HIF-1 $\alpha$  was assessed based on HIF-1 $\alpha$  expression in the nucleus. (c) Non-activated HIF-1 $\alpha$  expression was assessed in the cytoplasm. Data represent the means  $\pm$  SEM, \*\*\* $p$  < 0.001 by unpaired student's t-test with a 95% confidence interval.



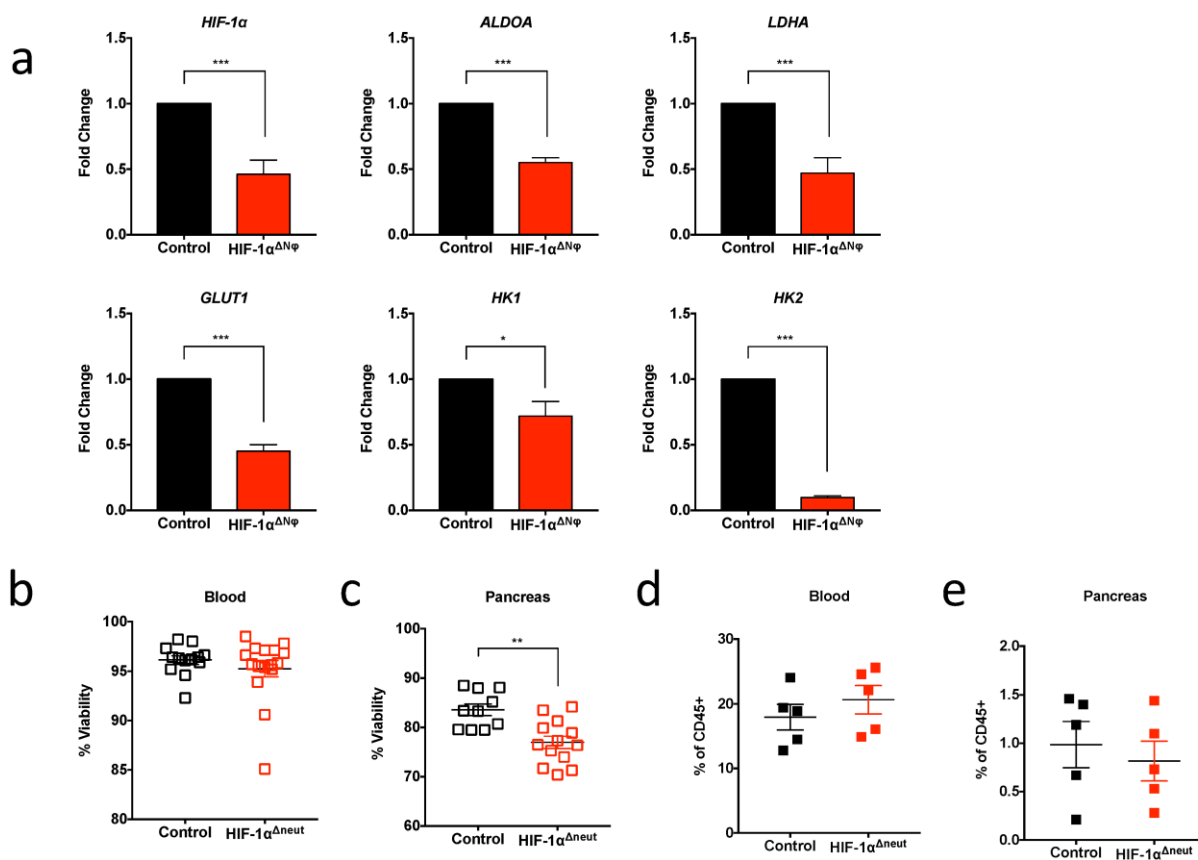

**Supplementary Figure S4.** (a) HIF-1 $\alpha^{\Delta N\phi}$  orthotopic transplanted and littermate HIF-1 $\alpha^{fl/fl}$  control mice pancreatic neutrophils were assessed at the transcript level for glycolytic markers, *HIF-1 $\alpha$* , *ALDOA*, *LDHA*, *GLUT1*, *HK1* and *HK2* (n = 3 mice per group, three independent experiments). (b-c) Blood and pancreatic tumors from tumor-bearing HIF-1 $\alpha^{\Delta N\phi}$  orthotopic transplanted (OT) and littermate HIF-1 $\alpha^{fl/fl}$  control OT mice were harvested at day 28 post transplantation and the myeloid cell populations were assessed by flow cytometry. The scatter plot of infiltrating neutrophils [Dapi-CD45<sup>+</sup>Lin(CD3/B220/NK1.1)<sup>-</sup>Ly6G<sup>+</sup>Ly6C<sup>+</sup>] are plotted as a percentage of total CD45<sup>+</sup> cells, from HIF-1 $\alpha^{\Delta N\phi}$  OT mice (red clear) and littermate HIF-1 $\alpha^{fl/fl}$  controls (black clear) (OT blood n = 16, sham n = 13; OT pancreas n = 13, sham n = 10; of three independent experiments, pooled). (d-e) Blood and pancreas from non tumor-bearing HIF-1 $\alpha^{\Delta N\phi}$  WT mice and littermate HIF-1 $\alpha^{fl/fl}$  control WT mice were harvested and the myeloid cell populations were assessed by flow cytometry. The scatter plot of infiltrating neutrophils [Dapi-CD45<sup>+</sup>Lin(CD3/B220/NK1.1)<sup>-</sup>Ly6G<sup>+</sup>Ly6C<sup>+</sup>] are plotted as a percentage of total CD45<sup>+</sup> cells, from HIF-1 $\alpha^{\Delta N\phi}$  WT mice (red solid) and littermate HIF-1 $\alpha^{fl/fl}$  WT controls (black solid) (n = 5). Data are means  $\pm$  SEM, \*p < 0.05; \*\*\*p < 0.001 by unpaired student's t-test with 95% confidence interval.



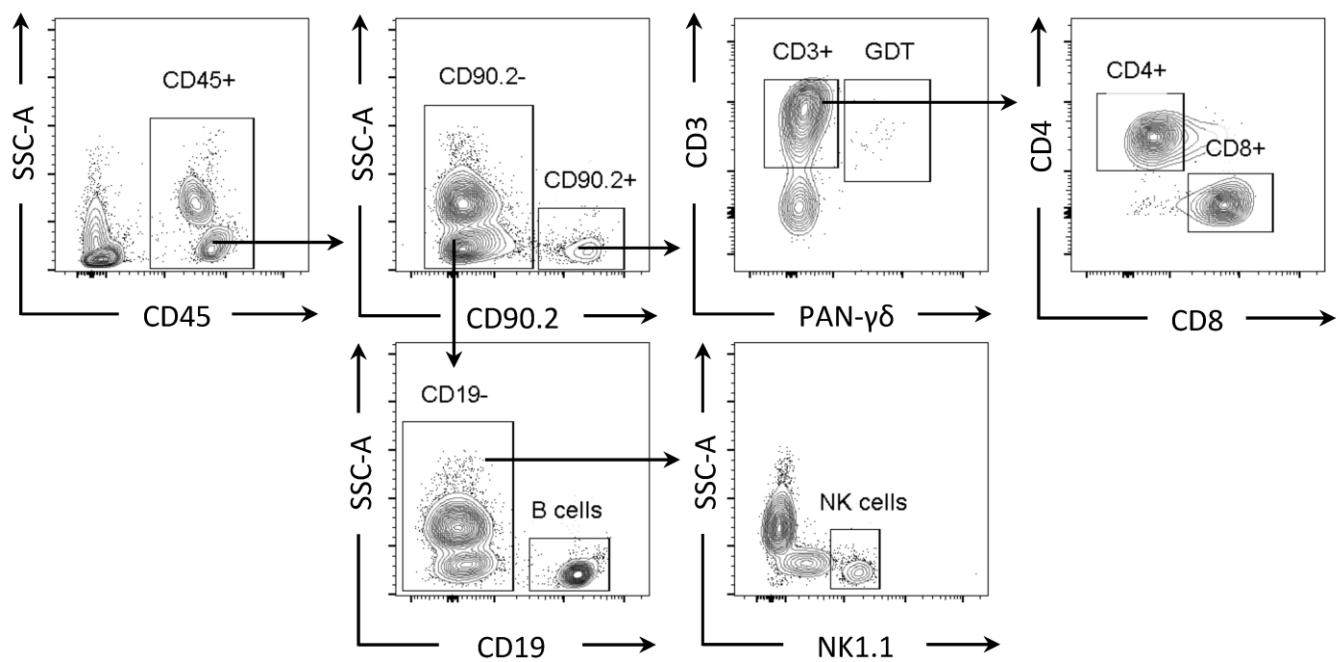

**Supplementary Figure S5.** Conditional knockout of HIF-1 $\alpha$  in neutrophils promotes anti-tumoral activity via increased ROS and activation of cytotoxic T lymphocytes (CTL) and natural killer (NK) cells cytotoxicity. Neutrophils infiltrate pancreatic tumor lesions in large numbers and adopt a metabolic signature similar to that of PDAC tumor cells and the Warburg effect. These infiltrating neutrophils support tumor progression by up-regulating HIF-1 $\alpha$  and Arg-1, thereby inhibiting anti-tumoral CTL and NK cell activity. Loss of HIF-1 $\alpha$  by conditional knockout in neutrophils subverts the pro-tumoral activity of these neutrophils by up-regulating ROS, and increasing the production of CTL/NK cell stimulating cytokines such as IL-12 and TNF- $\alpha$ . This mechanism opens new avenues for potential pharmacologies that target neutrophil metabolic pathways to improve disease outcomes.



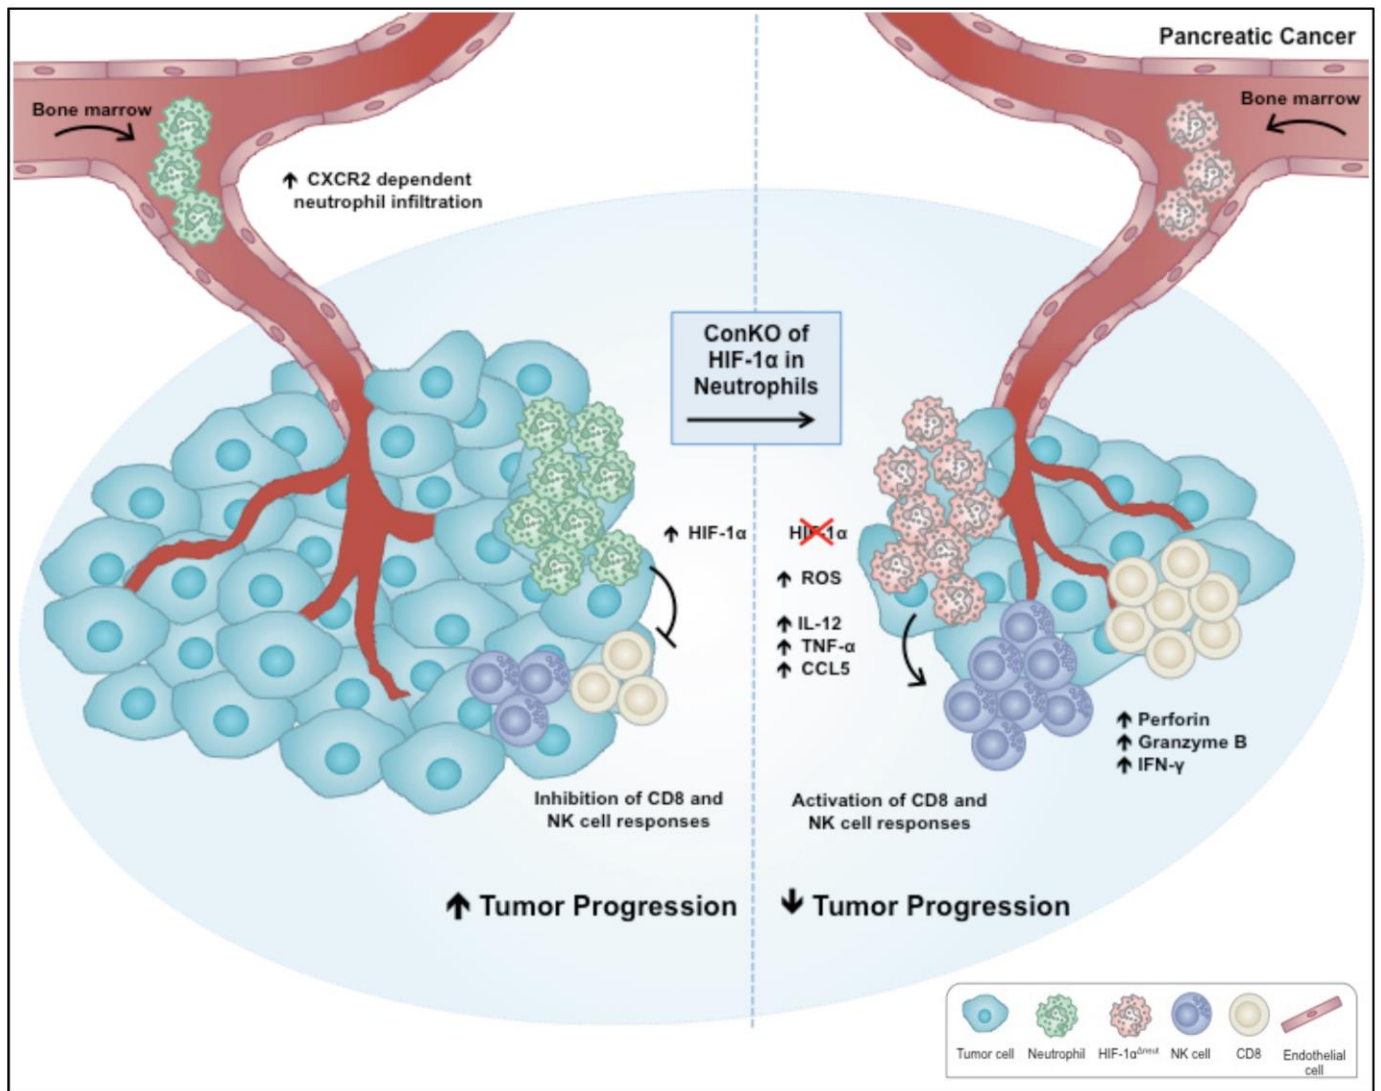

**Supplementary Figure S6.** Conditional knockout of HIF-1 $\alpha$  in neutrophils promotes anti-tumoral activity via increased ROS and activation of cytotoxic T lymphocytes (CTL) and natural killer (NK) cells cytotoxicity. Neutrophils infiltrate pancreatic tumor lesions in large numbers and adopt a metabolic signature similar to that of PDAC tumor cells and the Warburg effect. These infiltrating neutrophils support tumor progression by up-regulating HIF-1 $\alpha$  and Arg-1, thereby inhibiting anti-tumoral CTL and NK cell activity. Loss of HIF-1 $\alpha$  by conditional knockout in neutrophils subverts the pro-tumoral activity of these neutrophils by up-regulating ROS, and increasing the production of CTL/NK cell stimulating cytokines such as IL-12 and TNF- $\alpha$ . This mechanism opens new avenues for potential pharmacologies that target neutrophil metabolic pathways to improve disease outcomes.



**Supplementary Table S1.** Mouse primer sequences used for RT-qPCR

| Name of Primer           | Sequence (5' to 3')     |
|--------------------------|-------------------------|
| CCL2 – Forward           | CAGGTCCCTGTCATGCTTCT    |
| CCL2 – Reverse           | GTCAGCACAGACCTCTCTCT    |
| CCL3 – Forward           | ACCATGACACTCTGCAACCA    |
| CCL3 – Reverse           | TCAGGCATTCAGTTCCAGGT    |
| Arginase1 – Forward      | GATTGGCAAGGTGATGGAAG    |
| Arginase1 – Reverse      | TCAGTCCCTGGCTTATGGTT    |
| IL-12 – Forward          | CGTGCTCATGGCTGGTGCAAAG  |
| IL-12 – Reverse          | GAACACATGCCCACTTGCTG    |
| CCL5 – Forward           | ACCATGAAGATCTCTGCAGC    |
| CCL5 – Reverse           | TGAACCCACTTCTTCTCTGG    |
| HIF-1 $\alpha$ – Forward | GTCGGACAGCCTCACCAAACAG  |
| HIF-1 $\alpha$ – Reverse | TAGGTAGTGAGCCACCAGTGTCC |
| ALDOA – Forward          | AGAACACCGAGGAGAACAGG    |
| ALDOA – Reverse          | AGTTGTCTCGCCATTGGTTC    |
| LDHA – Forward           | GTGTAAGTGCGAAGTCCAAGC   |
| LDHA – Reverse           | TGGATTGGAGACGATCAGCAG   |
| GLUT1 – Forward          | CATCCTTATTGCCAGGTGTTT   |
| GLUT1 – Reverse          | GAAGACGACACTGAGCAGCAGA  |
| HK1 – Forward            | TGCCATGCGGCTCTCTGATG    |
| HK1 – Reverse            | CTTGACGGAGGCCGTTGGGTT   |
| HK2 – Forward            | AGCTGTTTGACCACATTGCC    |
| HK2 – Reverse            | CACGCCACTGGACTTGAAC     |
| $\beta$ -actin – Forward | AGAGGGAAATCGTGCGTGAC    |
| $\beta$ -actin – Reverse | CAATAGTGATGACCTGGCCGT   |
